# Supplementary material for: HBO1 determines SMAD action in pluripotency and mesendoderm specification
Source: PubMed Central journal article supplement — Nucleic Acids Res. 2024 Feb 29;52(9):4935–49. doi: 10.1093/nar/gkae158 (PMC11109972; doi:10.1093/nar/gkae158), 2024-02-29
Supplement: gkae158_supplemental_file.pdf [file gkae158_supplemental_file.pdf]

# Supplementary Figure 1

**A**

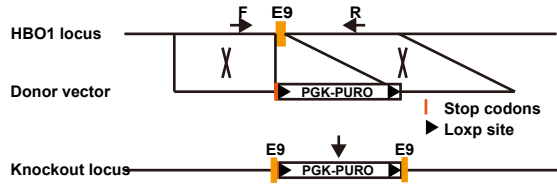

**B**

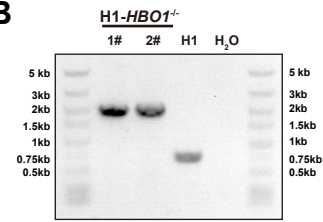

**C**

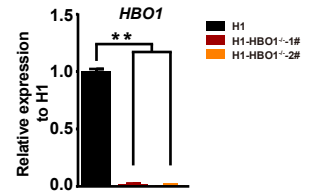

**D**

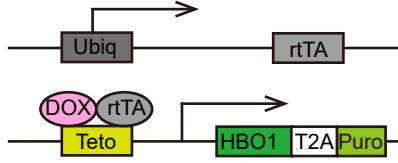

**E**

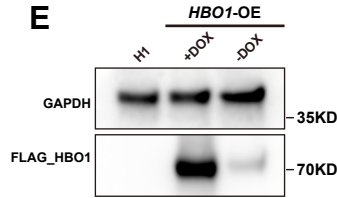

**F**

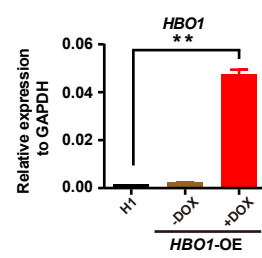

**G**

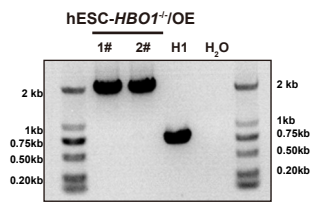

**H**

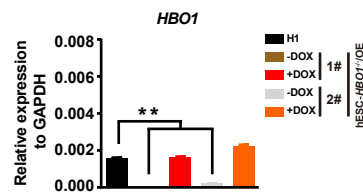

### Supplementary Figure 1. Deletion of *HBO1* in human embryonic stem cells.

(A) Overview of *HBO1* targeting strategy. sgRNA and a homologous targeting plasmid containing puromycin-resistant cassette were constructed according to the *HBO1* gene. (B) PCR identification of WT H1 and two *HBO1*<sup>-/-</sup> hESC clones. WT H1 hESCs served as negative control. (C) Expression of *HBO1* by RT-qPCR in WT H1 and *HBO1*<sup>-/-</sup> hESCs. WT H1 hESCs serve as a control. (D) Diagram of a lentiviral-based inducible system for HBO1 expression controlled by DOX treatment, referred to as *HBO1*-OE. (E) Western blot analysis of FLAG (HBO1) in WT H1 and *HBO1*-OE with or withdrawal of DOX (three days). GAPDH was used as a loading control. (F) Expression of *HBO1* by RT-qPCR in the indicated cell lines. WT H1 hESCs serve as a control. (G) PCR identification of WT H1 and two hESCs-*HBO1*<sup>-/-</sup>/OE clones. WT H1 hESCs served as a negative control. (H) Expression of *HBO1* by RT-qPCR in the indicated cell lines. WT H1 hESCs serve as a control. In C, F and H, the data represent mean  $\pm$  SD from three biological repeats with three technical replicates. The significance level was determined using unpaired two-tailed Student's t-tests. \*\*,P<0.01.

# Supplementary Figure 2

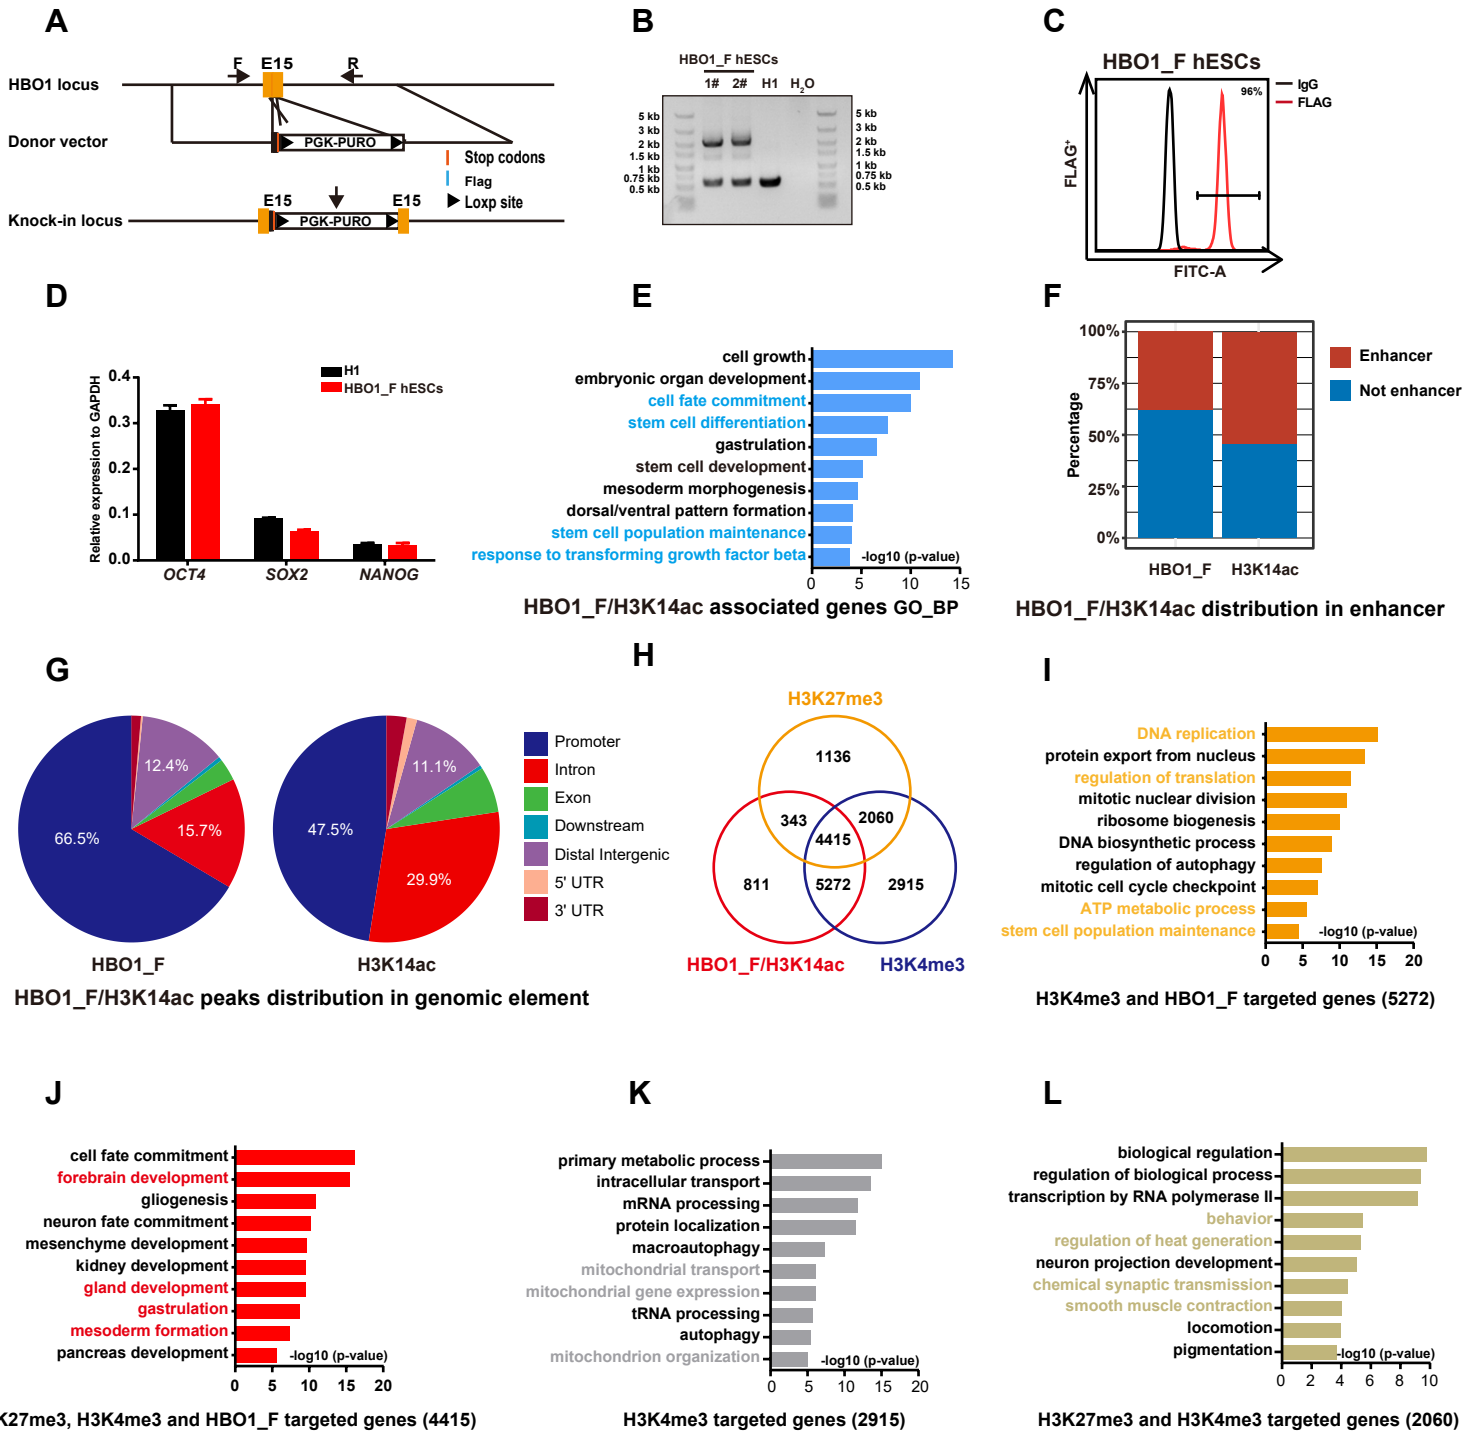

## Supplementary Figure 2. Knock in triple-FLAG into HBO1 locus in hESCs.

(A) Overview of HBO1 locus knock-in triple-FLAG strategy in hESCs. (B) PCR identification in WT and two HBO1\_F hESCs clones. WT hESCs served as a negative control. (C) FACS analysis of FLAG expression in HBO1\_F hESCs. (D) Expression of pluripotency genes by RT-qPCR in WT H1 and HBO1\_F hESCs. WT H1 hESCs serve as a control. The data represent mean  $\pm$  SD from three biological repeats with three technical repeats. The significance level was determined using unpaired two-tailed Student's t-tests. (E) GO terms of biological processes analysis of FLAG (HBO1\_F) and H3K14ac co-binding genes. (F) Histogram analysis of FLAG (HBO1\_F) and H3K14ac peaks distribution in enhancer. (G) Pie chart analysis of FLAG (HBO1\_F) and H3K14ac peaks distribution in genomic element. (H) Overlap between FLAG (HBO1\_F)/H3K14ac, H3K4me3 and H3K27me3 targeted genes in WT hESCs. H3K4me3 (23) and H3K27me3 (24) ChIP-seq data were published. (I) GO terms of biological processes analysis of H3K4me3 and HBO1\_F targeted genes (5272). (J) GO terms of biological processes analysis of H3K27me3, H3K4me3 and HBO1\_F targeted genes (4415). (K) GO terms of biological processes analysis of H3K4me3 targeted genes (2915). (L) GO terms of biological processes analysis of H3K27me3 and H3K4me3 targeted genes (2060).

Supplementary Figure 3

A

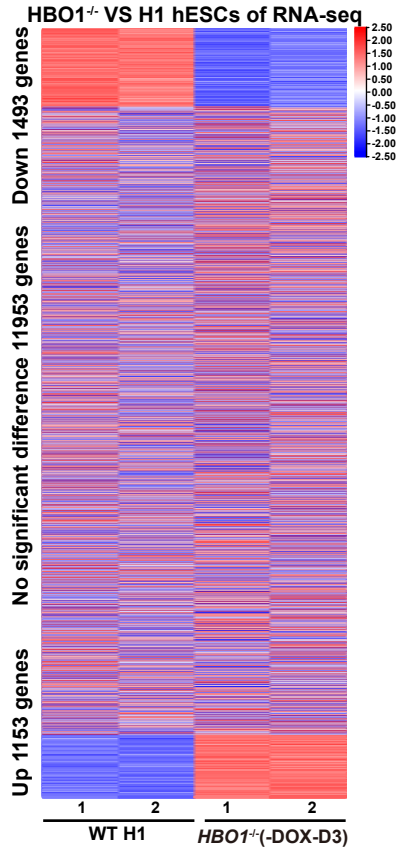

B

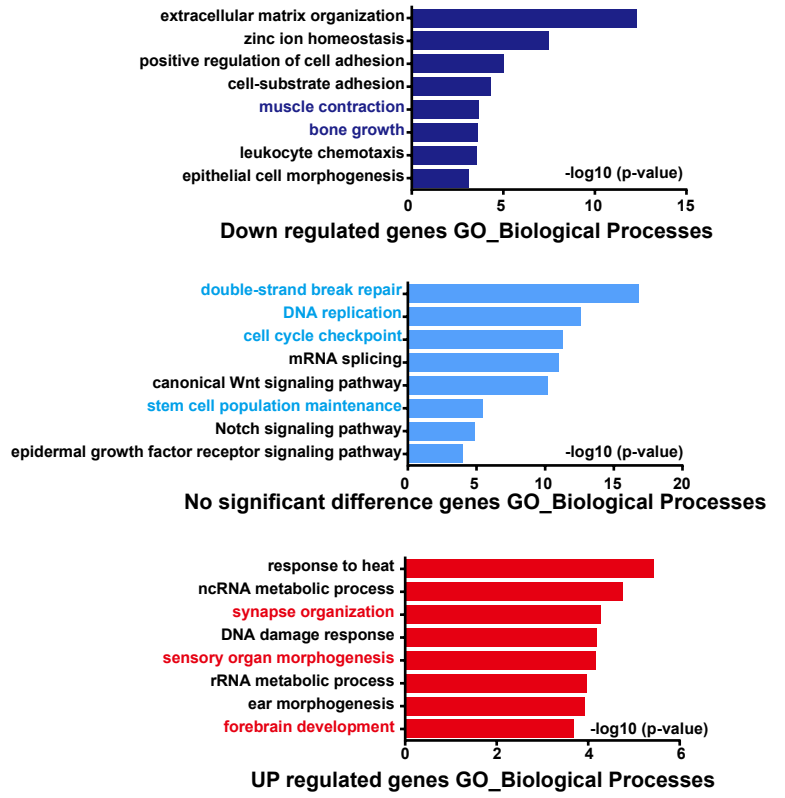

C

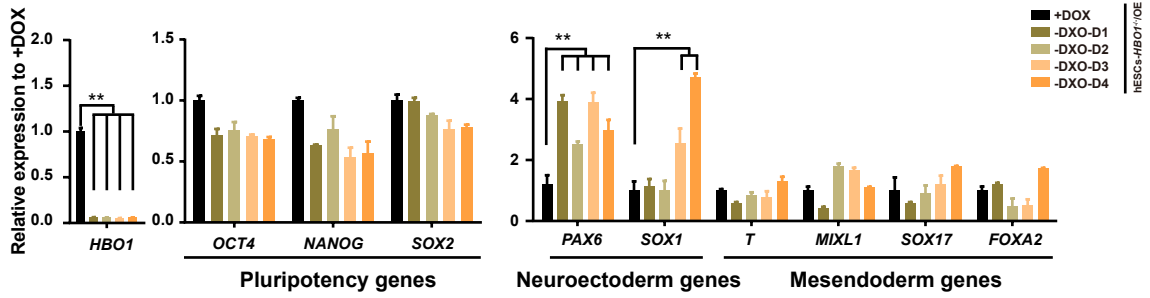

**Supplementary Figure 3. After three days withdrawal DOX, hESCs-*HBO1*<sup>-/-</sup>/OE cells still maintained undifferentiated state.**

(A) Data from RNA-seq. Heatmap analysis of up- or down-regulated and no significant genes from hESCs-*HBO1*<sup>-/-</sup>/OE (-DOX-day 3) compared with WT H1 hESCs. (B) GO terms of biological processes analysis of down-regulated, no significant and up-regulated genes, as described in A. (C) RT-qPCR analysis of *HBO1*, pluripotency, ectoderm and mesendoderm associated genes in hESCs-*HBO1*<sup>-/-</sup>/OE with or withdrawal of DOX. hESCs-*HBO1*<sup>-/-</sup>/OE with DOX serve as a control. The data represent mean  $\pm$  SD from three biological repeats with three technical repeats. The Significance level was determined using unpaired two-tailed Student's t-tests. \*\*,  $P < 0.01$ .

# Supplementary Figure 4

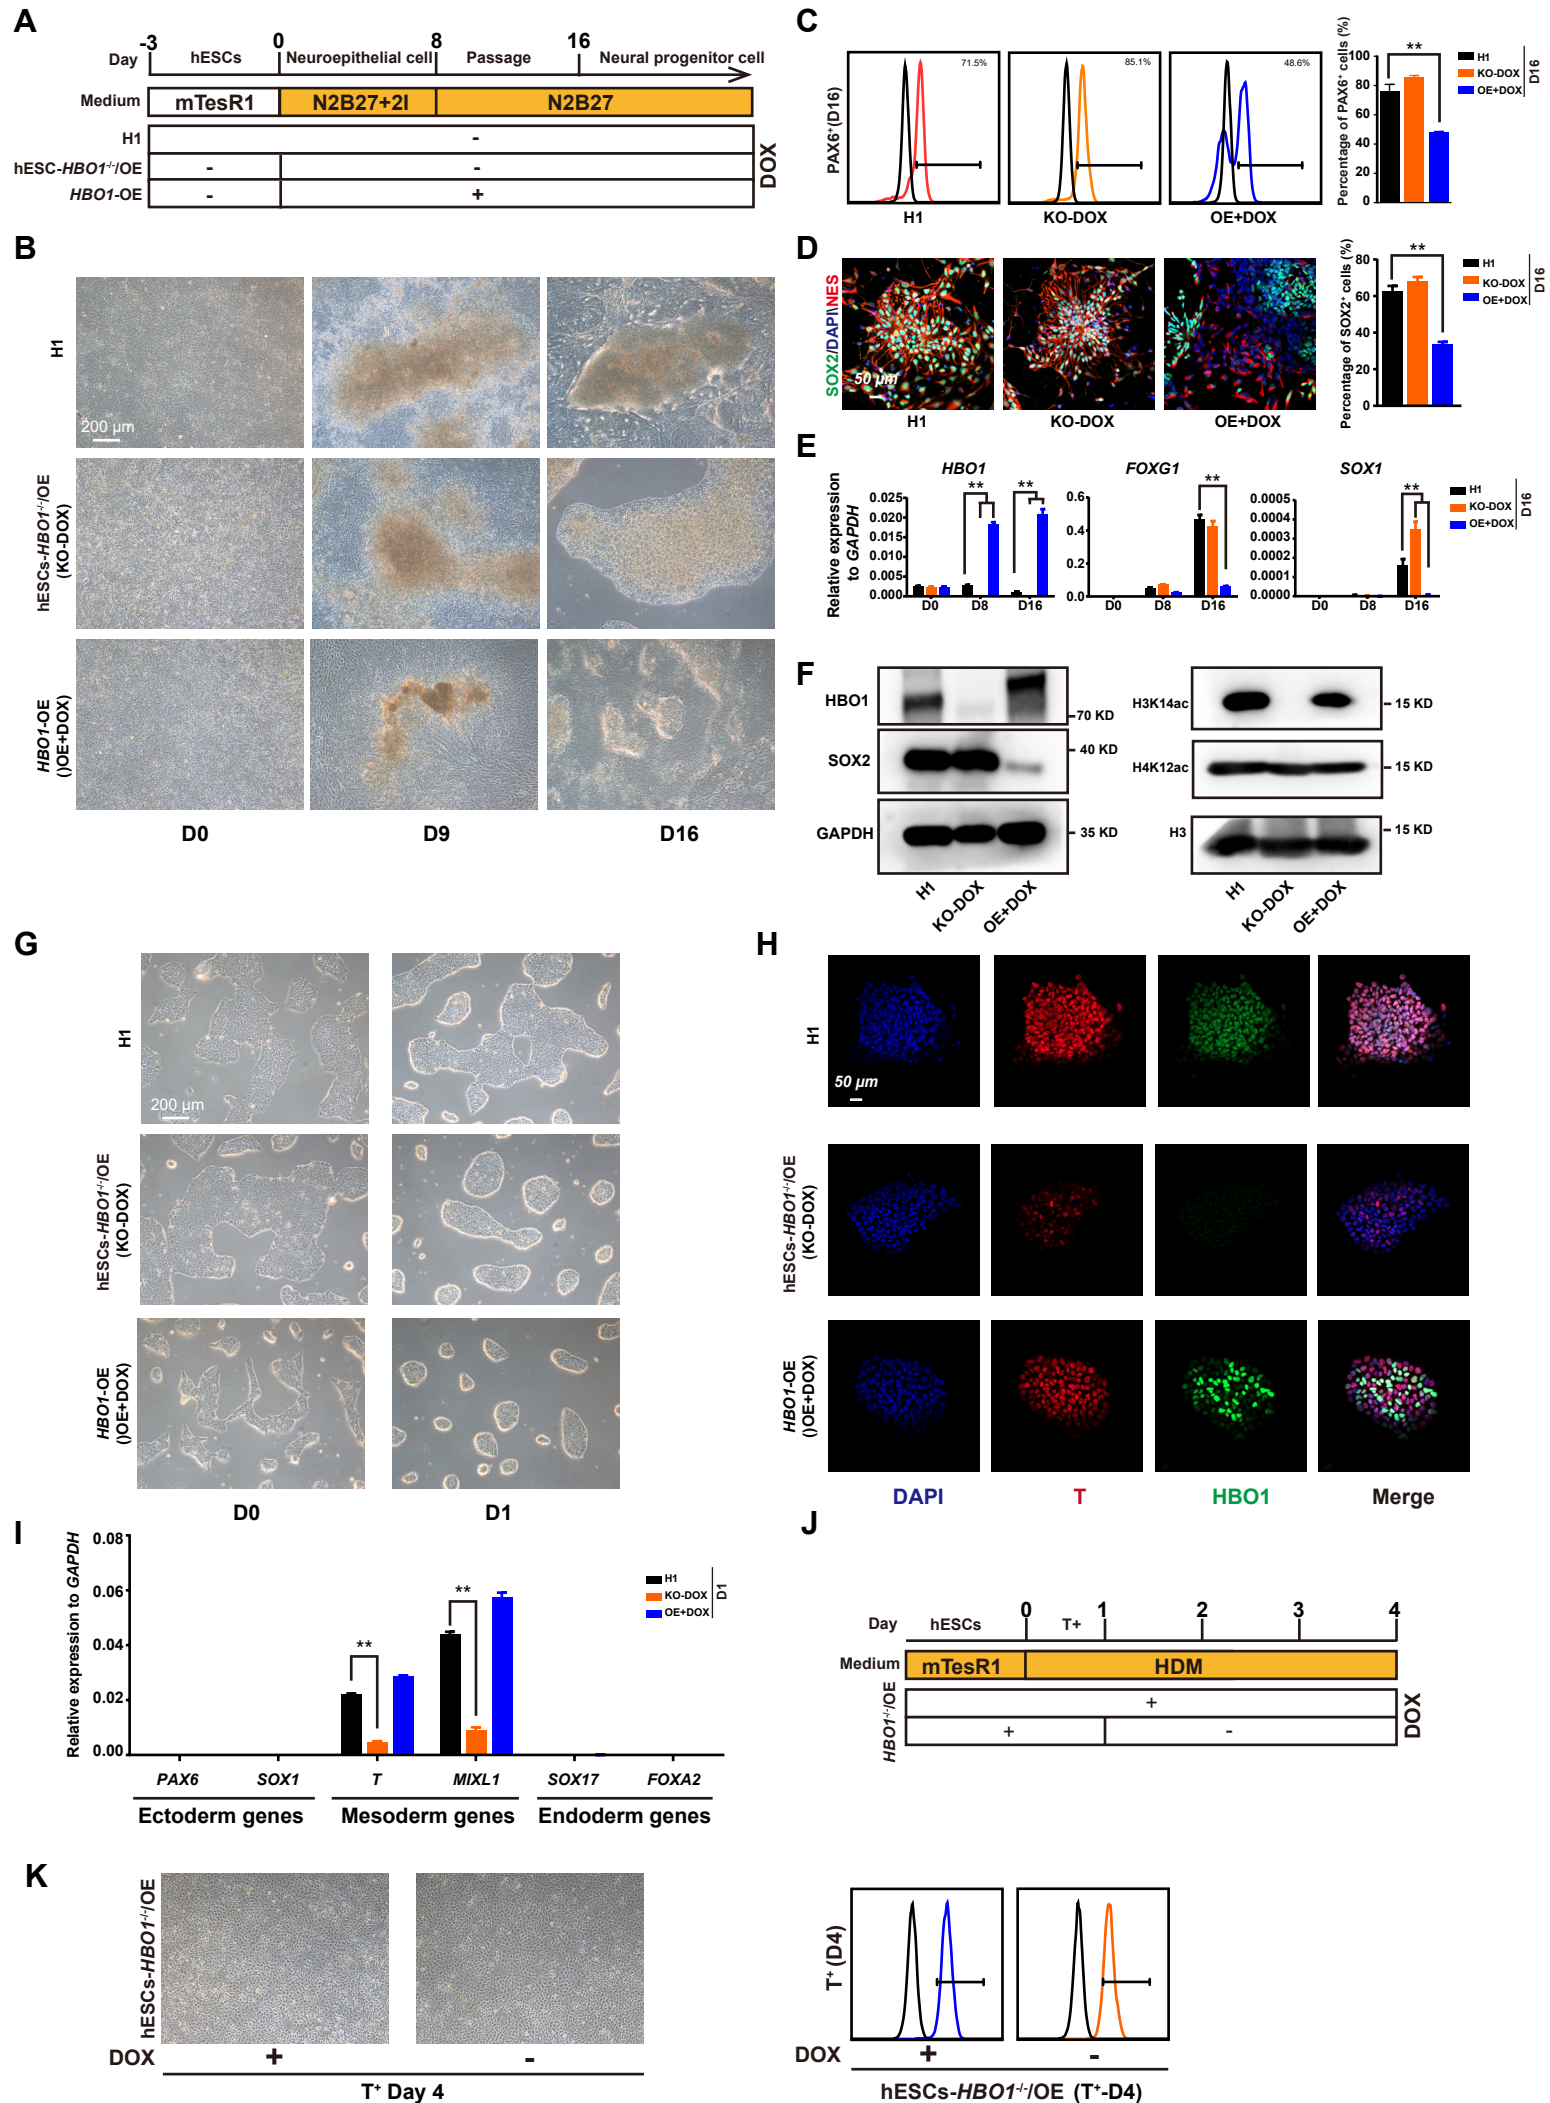

**Supplementary Figure 4. HBO1 inhibits neural differentiation but is essential for mesodermal differentiation.**

(A) Scheme for Neural progenitor cell differentiation from hESCs. (B) Representative images of Neural progenitor cells differentiation from WT H1 hESCs, hESCs-*HBO1*<sup>-/-</sup>/OE withdrawal of DOX (KO-DOX) and HBO1-OE with DOX (OE+DOX). The scale bar represents 200  $\mu$ m. (C) FACS analysis of PAX6 expression in the indicated cell lines at day 16 of neural differentiation. (D) Immunostaining analysis of neuroectoderm markers SOX2/NES expression in the indicated cell lines. The scale bar represents 50  $\mu$ m. (E) RT-qPCR analysis of *HBO1*, *FOXP1* and *SOX1* expression in the indicated cell lines. H1 serve as a control. (F) Western blot analysis of FLAG (HBO1), SOX2, H3K14ac and H3K23ac in the indicated cell lines. GAPDH and H3 serve as a loading control. (G) Representative images of T<sup>+</sup> cells differentiation from WT H1 hESCs, hESCs-*HBO1*<sup>-/-</sup>/OE withdrawal of DOX (KO-DOX) and HBO1-OE with DOX (OE+DOX). (H) Immunostaining analysis of T and HBO1 expression in the indicated cell lines. The scale bar represents 50  $\mu$ m. (I) RT-qPCR analysis of ectoderm, mesoderm and endoderm genes expression in the indicated cell lines. H1 serve as a control. (J) Scheme for T<sup>+</sup> cell differentiation from hESCs-*HBO1*<sup>-/-</sup>/OE with DOX, and then these cells were cultured using same medium with or without DOX for 3 days. (K) Left: Representative images of T<sup>+</sup> cells differentiation from hESCs-*HBO1*<sup>-/-</sup>/OE with or without DOX for 3 days. Right: FACS analysis of T expression in the indicated cell lines at day 4 of T<sup>+</sup> cells differentiation. In C and D, the data represent mean  $\pm$  SD from three biological repeats. In E and I, the data represent mean  $\pm$  SD from three biological repeats with three technical repeats. The Significance level was determined using unpaired two-tailed Student's t-tests. \*\*,P<0.01.



# Supplementary Figure 5

**A**

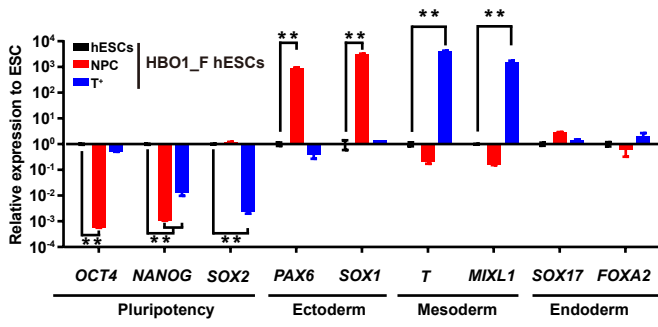

**B**

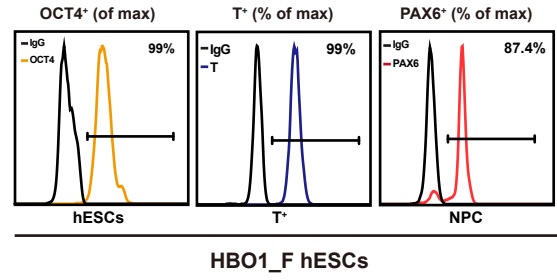

**C**

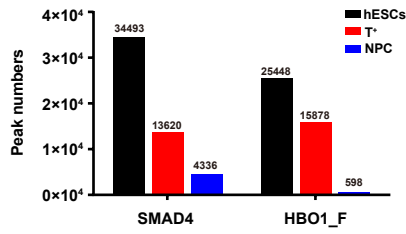

**D**

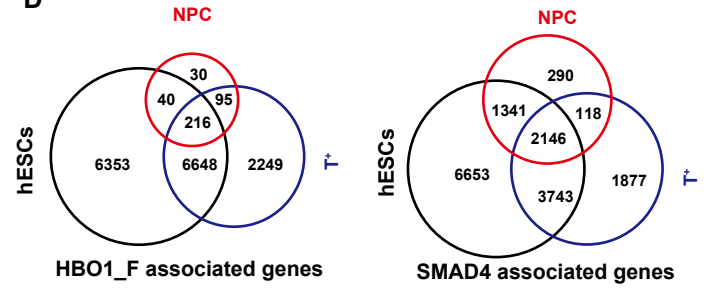

**E**

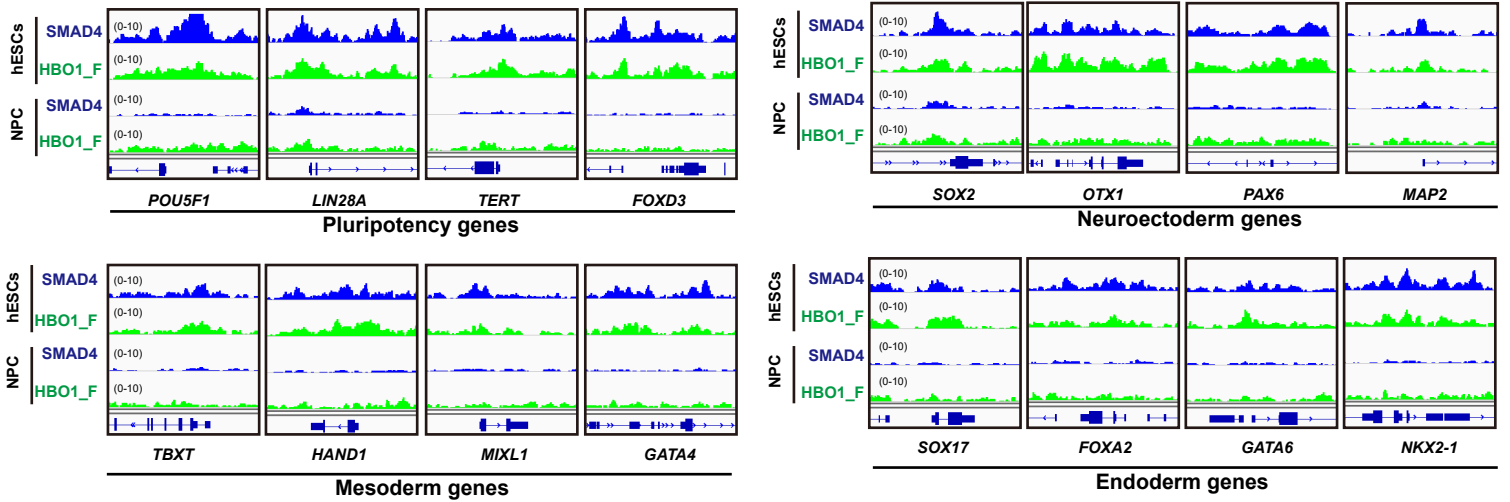

**Supplementary Figure 5. HBO1 and SMAD4 bind in the chromatin of mesoderm genes upon pluripotency exit.**

(A) Expression of pluripotency, neuroectoderm, mesoderm, and endoderm associated genes by RT-qPCR in the indicated cell lines. HBO1\_F hESCs serve as control. The data represent mean  $\pm$  SD from three biological repeats with three technical repeats. The significance level was determined using unpaired two-tailed Student's t-tests. \*\*,  $P < 0.01$ . (B) FACS analysis of OCT4, T and PAX6 expression in the indicated cell lines. (C) Bar diagram analysis of the number of SMAD4 and FLAG (HBO1\_F) peaks from CUT&Tag-seq data in hESCs, T<sup>+</sup> cells, and NPC. (D) Left: overlap of FLAG (HBO1\_F) binding genes between hESCs, T<sup>+</sup> cells, and NPC. Right: overlap of SMAD4 binding genes between hESCs, T<sup>+</sup> cells, and NPC. (E) Genomic views analysis of the SMAD4 and FLAG (HBO1\_F) binding in hESCs and NPC cells.

**Supplementary Table 1. List of sgRNAs and primers for gene targeting**

| Knock-out   |                      |                                           |                               |                               |                              |
|-------------|----------------------|-------------------------------------------|-------------------------------|-------------------------------|------------------------------|
| Gene        | sgRNA sequence       | Primers for donor DNA construction(5'-3') |                               | Primers for validation(5'-3') |                              |
| <i>HBO1</i> | ACCAGGTATCAAGCTCATAG | <i>HBO1</i> -5'-LA-F                      | AGAGGCAGGGTTTGCTGGCTAC        | KO-F                          | CCTCTGCCTCTTGGGCGATTC        |
|             |                      | <i>HBO1</i> -5'-LA-R                      | CTCCTATTGCCAAGAAATCAAAAGTCA   |                               |                              |
|             |                      | <i>HBO1</i> -3'-RA-F                      | GCACATGGTGAGTTGTCTTGGGTT      | KO-R                          | GAAATGAAGAGCAGTAGGCAGCAAG    |
|             |                      | <i>HBO1</i> -3'-RA-R                      | CTGGAGAACCTGAGTCAAAGCAA<br>CA |                               |                              |
| Knock-in    |                      |                                           |                               |                               |                              |
| Gene        | sgRNA sequence       | Primers for donor DNA construction(5'-3') |                               | Primers for validation(5'-3') |                              |
| <i>HBO1</i> | AAATGACAGACAGATCCCTA | <i>HBO1</i> -5'-LA-F                      | GTTTCCCCTGAATGTGAGAACGG       | KI-F                          | TCACTGAGGGTAAAGTAGGAAGAATGG  |
|             |                      | <i>HBO1</i> -5'-LA-R                      | AGTGCCCTTGGGAGGGGTCC          |                               |                              |
|             |                      | <i>HBO1</i> -3'-RA-F                      | AGTGACCTGTCATTCCGAGCCA        | KI-R                          | AGTACCATAACAGAACTCCTTGGGTCAG |
|             |                      | <i>HBO1</i> -3'-RA-R                      | AGCCACAAACCACATCCCTCAAC       |                               |                              |

**Supplementary Table 2. List of primers**

| Gene                 | Forward primer(5'-3')        | Reverse primer(5'-3')                |
|----------------------|------------------------------|--------------------------------------|
| FUW-HBO1             | ATGCCGCGAAGGAAGAGGAA         | AGTGCCCTTGGGAGGGGTCC                 |
| pSIN-HBO1            | ATGCCGCGAAGGAAGAGGAAT        | TTAAGTGCCCTTGGGAGGGGT                |
| pSIN-H_NTD           | ATGACAGAGGGAAGCAACATGATTAACA | TTAAGTGCCCTTGGGAGGGGT                |
| pSIN-H_MYST          | ATGCCGCGAAGGAAGAGGAAT        | TTAGATTTGGCCTTGCAGCCTTA              |
| pSIN-H_HAT           | ATGCCGCGAAGGAAGAGGAAT        | TTAGGGCTCCACATCATAATATAATGTCT<br>TGT |
| Q-H_NTD              | AAGAGCCAAACGATACTCCGCC       | TGTTGTCCGCCTCTGTGATAACATAG           |
| Q-H_MYST             | TCTGGACTGAGCAAAGAACAGAAAGAG  | GAATTGGCCGCCTAGATGC                  |
| Q-H_HAT              | TTAGAAAACCTGACAAGCGAGTATGAC  | ATGTTGCTTCCCTCTGTGATTTGG             |
| <i>GAPDH</i>         | GGAGCGAGATCCCTCCAAAAT        | GGCTGTTGTCATACTTCTCATGG              |
| <i>OCT4</i>          | CCTCACTTCACTGCACTGTA         | CAGGTTTTCTTTCCCTAGCT                 |
| <i>SOX2</i>          | CCCAGCAGACTTCACATGT          | CCTCCATTTCCTCGTTTT                   |
| <i>NANOG</i>         | TGAACCTCAGCTACAAACAG         | TGGTGGTAGGAAGAGTAAAG                 |
| <i>PAX6</i>          | ATGTGTGAGTAAAATTCTGGGCA      | GCTTACAACCTCTGGAGTCGCTA              |
| <i>FOXP1</i>         | GAGCGACGACGTGTTTCATC         | GCCGTTGTAACCTCAAAGTGCTG              |
| <i>SOX1</i>          | AATTTTATTTTCGGCGTTGC         | TGGGCTCTGTCTCTTAAATTTGT              |
| <i>MAP2</i>          | TGAAGCAAAGGCACCTCAC          | TATGGGAATCCATTGGCG                   |
| <i>NGN2</i>          | AGGAAGAGGACGTGTTAGTGC        | GCAATCGTGTACCAGACCCAG                |
| <i>TUJ1</i>          | GGCCAAGGGTCACTACACG          | GCAGTCGCAGTTTTCACACTC                |
| <i>OTX2</i>          | CAAAGTGAGACCTGCCAAAAAGA      | TGGACAAGGGATCTGACAGTG                |
| <i>T (BRACHYURY)</i> | GAGAGCGAGCTGTGGCTGCG         | CGTACTTCCAGCGGTGGTTGTC               |
| <i>RUNX1</i>         | CTGCCATCGCTTTCAAGGT          | GCCGAGTAGTTTTTCATCATTGCC             |
| <i>EOMES</i>         | ATTCCACCGCCACCAAAGTGAAG      | CAGTGGGATTGAGTCCGTTTATGTTG           |
| <i>MIXL1</i>         | GCAAGCGCACGTCTTTCAGC         | CGAGACTTGGCAGGCCTGTTT                |
| <i>FOXA2</i>         | CAGTATGCTGGGAGCGGTGAAG       | TGTTGCTCACGGAGGAGTAGCC               |
| <i>SOX17</i>         | ACGCTTTCATGGTGTGGGCTAAG      | CGCTCTGCCTCCTCCACGAAG                |
| <i>HBO1</i>          | TTAGAAAACCTGACAAGCGAGTATGAC  | ATGTTGCTTCCCTCTGTGATTTGG             |
| <i>TGFB1</i>         | GGCCGGGGAGAGTGCAGAAC         | TGAGCCTCAGCAGACGCAGC                 |
| <i>NODAL</i>         | TCCCCTCTGGCGTACATGCTG        | TGAAGCCTGCTCTGTGTCGGG                |
| <i>LEFTY1</i>        | TGCAGCTGTGCCTCGGATGG         | CAGTCATCGCCAGCTCTCCTGG               |
| <i>LEFTY2</i>        | TCCATTGAGCCCTCTAACTGAACG     | GGGTGATGGACGGGAAAGACAG               |
| <i>SMAD6</i>         | ATCTCCGCCACCTCCCTACTCTC      | TGGTCGTACACCGCATAGAGGC               |
| <i>SMAD7</i>         | ACTGTCCAGATGCTGTGCCTTCC      | GCTGACTCTGTGTGCCGAATTGAG             |

**Supplementary Table 3. List of antibodies used in this study**

| Name of Antibody                                                             | Company (Cat. No.)                 | Application           |
|------------------------------------------------------------------------------|------------------------------------|-----------------------|
| HRP-Conjugated GAPDH Monoclonal Antibody                                     | Proteintech (HRP-60004)            | WB                    |
| Rabbit anti-MYST2 (HBO1)                                                     | Cell Signaling Technology (58418S) | WB/IF                 |
| Mouse anti-OCT-3/4                                                           | Santa Cruz Biotechnology (sc-5279) | WB                    |
| Rabbit anti-NANOG                                                            | Cell Signaling Technology (3580S)  | WB                    |
| Rabbit anti-Sox2                                                             | Cell Signaling Technology (23064S) | WB/IF                 |
| Mouse anti-SOX2                                                              | R&D (mab2018)                      | WB/IF                 |
| Rabbit anti-HIST3H3 (H3)                                                     | Abcam (ab1791)                     | WB                    |
| Rabbit anti-Histone H3 (acetyl K23)                                          | Abcam (ab177275)                   | WB                    |
| Rabbit anti-Histone H3 (acetyl K14)                                          | Cell Signaling Technology (7627S)  | WB                    |
| Rabbit anti-Histone H4 (acetyl K5)                                           | Cell Signaling Technology (8346T)  | WB                    |
| Rabbit anti-Histone H4 (tri methyl K12)                                      | Cell Signaling Technology (8346T)  | WB                    |
| mouse Monoclonal ANTI-FLAG                                                   | Sigma (F1804)                      | WB/FACS/Co-IP/CUT-Tag |
| mouse anti-HA                                                                | Sigma (H3663)                      | Co-IP                 |
| Rabbit anti-SMAD4                                                            | Cell Signaling Technology (46535)  | CUT-Tag               |
| Rabbit anti-TUJ1                                                             | Genetex (GTX130245)                | IF                    |
| Rabbit anti-MAP2                                                             | Cell Signaling Technology (8707)   | IF                    |
| Mouse anti-NES                                                               | Cell Signaling Technology (33475)  | IF                    |
| Rabbit anti-GATA3                                                            | Cell Signaling Technology (5852)   | IF                    |
| Goat anti-T                                                                  | R&D (AF2085)                       | IF                    |
| Goat anti-SOX17                                                              | R&D (AF1924)                       | IF                    |
| Rabbit anti-GATA6                                                            | Cell Signaling Technology (5851T)  | IF                    |
| Goat anti-Mouse IgG (H+L) Cross-Adsorbed Secondary Antibody, Alexa Fluor 568 | Thermo Fisher Scientific (A-11004) | IF                    |

|                                                                                 |                                    |      |
|---------------------------------------------------------------------------------|------------------------------------|------|
| Goat anti-Rabbit IgG (H+L) Cross-Adsorbed Secondary Antibody, Alexa Fluor 568   | Thermo Fisher Scientific (A-11011) | IF   |
| Goat anti-Rabbit IgG (H+L) Cross-Adsorbed Secondary Antibody, Alexa Fluor 488   | Thermo Fisher Scientific (A-11008) | IF   |
| Goat anti-Mouse IgG (H+L) Cross-Adsorbed Secondary Antibody, Alexa Fluor 488    | Thermo Fisher Scientific (A-11001) | FACS |
| Donkey anti-Goat IgG (H+L) Cross-Adsorbed Secondary Antibody, Alexa Fluor 647   | Thermo Fisher Scientific (A-21447) | IF   |
| Donkey anti-Rabbit IgG (H+L) Cross-Adsorbed Secondary Antibody, Alexa Fluor 488 | Thermo Fisher Scientific (A-21206) | IF   |
| Mouse anti-PAX6                                                                 | BD Biosciences (561664)            | FACS |
| Anti-Brachyury-FITC Antibody                                                    | Sigma (FCMAB302F)                  | FACS |
| Alexa Fluor®488 Mouse IgG2a, κ Isotype control                                  | BD biosciences (558055)            | FACS |
